# Supplementary figures and images for: An updated infra‐familial classification of Sapindaceae based on targeted enrichment data
Source: PubMed Central journal article supplement — Am J Bot. 2021 Jul 5;108(7):1234–51. doi: 10.1002/ajb2.1693 (PMC8361682; doi:10.1002/ajb2.1693), 2021-07-05

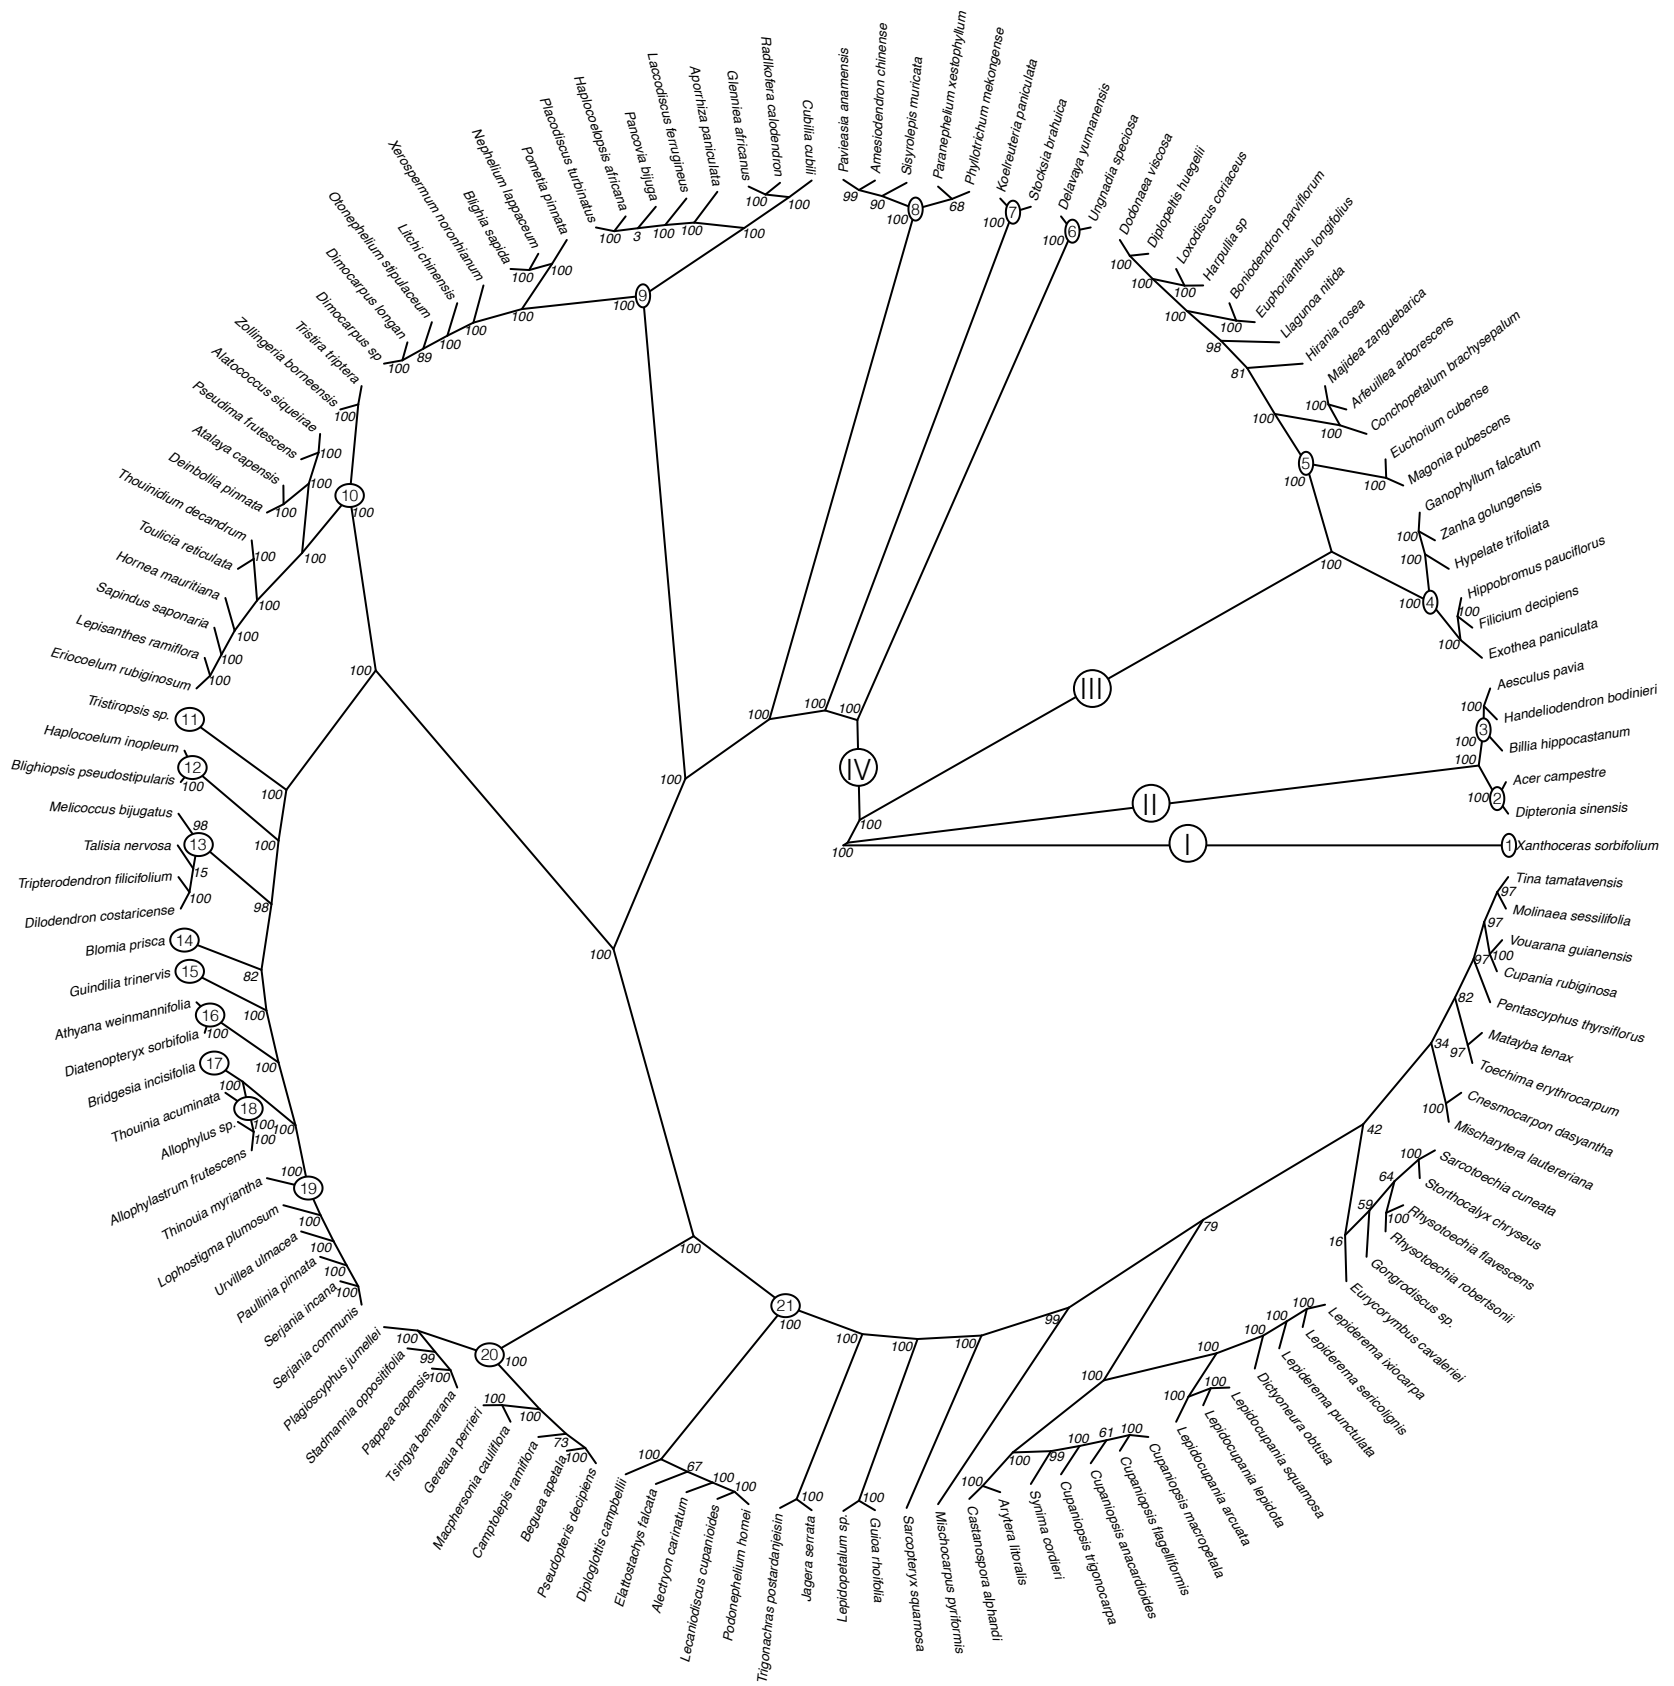

Supplement: AJB2-108-1234-s003.pdf [file AJB2-108-1234-s003.pdf]
